# Supplementary material
Source: PubMed Central journal article supplement (PMC5878961)
Supplement: supp_6.1.E57_original-submission.pdf [file supp_6.1.E57_original-submission.pdf]

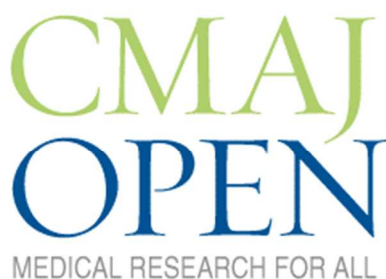

**Career success is associated with financial conflict of interest among biomedical authors of high-impact oncology publications**

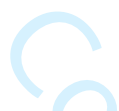

|                               |                                                                                                                                                                                                                                                                                                                                                                                                                                                                                                                                                                                                                                                                                                                                                                                                                                                                                                                                                                                                                                         |
|-------------------------------|-----------------------------------------------------------------------------------------------------------------------------------------------------------------------------------------------------------------------------------------------------------------------------------------------------------------------------------------------------------------------------------------------------------------------------------------------------------------------------------------------------------------------------------------------------------------------------------------------------------------------------------------------------------------------------------------------------------------------------------------------------------------------------------------------------------------------------------------------------------------------------------------------------------------------------------------------------------------------------------------------------------------------------------------|
| Journal:                      | <i>CMAJ Open</i>                                                                                                                                                                                                                                                                                                                                                                                                                                                                                                                                                                                                                                                                                                                                                                                                                                                                                                                                                                                                                        |
| Manuscript ID                 | CMAJOpen-2017-0095                                                                                                                                                                                                                                                                                                                                                                                                                                                                                                                                                                                                                                                                                                                                                                                                                                                                                                                                                                                                                      |
| Manuscript Type:              | Other                                                                                                                                                                                                                                                                                                                                                                                                                                                                                                                                                                                                                                                                                                                                                                                                                                                                                                                                                                                                                                   |
| Date Submitted by the Author: | 24-Jul-2017                                                                                                                                                                                                                                                                                                                                                                                                                                                                                                                                                                                                                                                                                                                                                                                                                                                                                                                                                                                                                             |
| Complete List of Authors:     | Kaestner, Victoria; Oregon Health and Science University, Knight Cancer Institute<br>Edmiston, Jonathan; Oregon Health and Science University, School of Medicine<br>Prasad, Vinay; Oregon Health and Science University, Hematology and Medical Oncology                                                                                                                                                                                                                                                                                                                                                                                                                                                                                                                                                                                                                                                                                                                                                                               |
| Keywords:                     | Ethics-Research, Health policy, Medical careers, Public health                                                                                                                                                                                                                                                                                                                                                                                                                                                                                                                                                                                                                                                                                                                                                                                                                                                                                                                                                                          |
| More Detailed Keywords:       |                                                                                                                                                                                                                                                                                                                                                                                                                                                                                                                                                                                                                                                                                                                                                                                                                                                                                                                                                                                                                                         |
| Abstract:                     | <p><b>Background</b><br/>Prior research has investigated the frequency of financial conflict of interest from the biopharmaceutical industry among physicians, their link to research outcomes and prescribing patterns, but to our knowledge no investigation has linked personal payments to career metrics, such as the rate of academic publication.</p> <p><b>Methods</b><br/>We assembled a set of US based physicians who had authored a first or last author paper on hematologic or oncologic topic in a high impact factor journal in 2015. We ascertained their publication history from Scopus, and personal and research payments from CMS Open Payments (2013-2015).</p> <p><b>Results</b><br/>We examined 435 physicians, who had authored a median of 140 publications, earning a median h-index of 36 and 5639 citations. The median total of general payments from 2013-2015 was \$3282 (Range 0-3.4 million dollars). The median amount of research payments from 2013-2015 was \$3500, (Range 0 to 23 million).</p> |

1  
2  
3  
4  
5  
6  
7  
8  
9  
10  
11  
12  
13  
14  
15  
16  
17  
18  
19  
20  
21  
22  
23  
24  
25  
26  
27  
28  
29  
30  
31  
32  
33  
34  
35  
36  
37  
38  
39  
40  
41  
42  
43  
44  
45  
46  
47  
48  
49  
50  
51  
52  
53  
54  
55  
56  
57  
58  
59  
60

|  |                                                                                                                                                                                                                                                                                                                                                                                                                                                                                                                                                       |
|--|-------------------------------------------------------------------------------------------------------------------------------------------------------------------------------------------------------------------------------------------------------------------------------------------------------------------------------------------------------------------------------------------------------------------------------------------------------------------------------------------------------------------------------------------------------|
|  | <p>General payments were associated with contemporary publications with an increase of 1.99 papers (95% CI 1.1 to 2.9) per \$10,000 in payments. This persisted in multivariate analysis, adjusting for number of prior publications, seniority, and research payments (0.84 papers (95%CI 0.15 to 1.5) per \$10,000 in payments).</p> <p>Conclusion<br/>There is a positive association between personal payments and publications, and this persists after adjustment for prior publications, years since medical school and research payments.</p> |
|  |                                                                                                                                                                                                                                                                                                                                                                                                                                                                                                                                                       |

SCHOLARONE™  
Manuscripts

Confidential

1  
2  
3 **Career success is associated with financial conflict of interest among biomedical**  
4  
5 **authors of high-impact oncology publications: A cross-sectional study**  
6  
7  
8  
9  
10

11 Victoria Kaestner, BA  
12 Division of Hematology and Medical Oncology, Knight Cancer Institute,  
13 Oregon Health & Science University  
14 kaestner@ohsu.edu  
15

16  
17 Jonathan B. Edmiston, BS  
18 School of Medicine, Oregon Health and Science University  
19 blair.edmiston@gmail.com  
20

21 Vinay Prasad, MD, MPH<sup>123</sup>  
22 1 Division of Hematology and Medical Oncology, Knight Cancer Institute,  
23 2 Department of Preventive Medicine and Public Health  
24 3 Center for Health Care Ethics, Oregon Health and Science University, Portland, OR  
25  
26

27 Address correspondence to:  
28 Vinay Prasad MD MPH  
29 Assistant Professor of Medicine  
30 Oregon Health & Science University  
31 3181 SW Sam Jackson Park Road  
32 Portland, Oregon 97239  
33 Tel: 503-494-3159  
34 Fax 503-494-3257  
35 prasad@ohsu.edu  
36  
37

38  
39 Manuscript Word Count: 2000  
40 Abstract word count: 220  
41 References: 28  
42 Tables: 2  
43 Figures: 4  
44  
45  
46  
47  
48  
49  
50  
51  
52  
53  
54  
55  
56  
57  
58  
59  
60

## Abstract

### Background

Prior research has investigated the frequency of financial conflict of interest from the biopharmaceutical industry among physicians, their link to research outcomes and prescribing patterns, but to our knowledge no investigation has linked personal payments to career metrics, such as the rate of academic publication.

### Methods

We assembled a set of US based physicians who had authored a first or last author paper on hematologic or oncologic topic in a high impact factor journal in 2015. We ascertained their publication history from Scopus, and personal and research payments from CMS Open Payments (2013-2015).

### Results

We examined 435 physicians, who had authored a median of 140 publications, earning a median h-index of 36 and 5639 citations. The median total of general payments from 2013-2015 was \$3282 (Range 0-3.4 million dollars). The median amount of research payments from 2013-2015 was \$3500, (Range 0 to 23 million).

General payments were associated with contemporary publications with an increase of 1.99 papers (95% CI 1.1 to 2.9) per \$10,000 in payments. This persisted in multivariate analysis, adjusting for number of prior publications, seniority, and research payments (0.84 papers (95%CI 0.15 to 1.5) per \$10,000 in payments).

## Conclusion

There is a positive association between personal payments and publications, and this persists after adjustment for prior publications, years since medical school and research payments.

Confidential

## **Career success is associated with financial conflict of interest among biomedical authors of high-impact oncology publications**

### **Introduction**

Receiving payments and other valuable or desired items from the pharmaceutical industry is considered a financial conflict of interest among health care providers<sup>1</sup>, has been found to be widespread<sup>2-7</sup>, and has been linked to provider behavior. Receipt of a meal where a specific drug is promoted has been linked to increased prescribing of that drug<sup>8</sup>. Acceptance of payments from the biopharmaceutical industry has been associated with increased brand name prescribing<sup>9,10</sup>.

Conflict may be even more apparent with respect to the results of research and their interpretation. A Cochrane review of 48 papers showed consistently that Industry sponsored studies have more favorable efficacy results and conclusions, while minimizing harms<sup>11</sup>. Others have shown industry sponsored cost-effectiveness analyses are more likely to reach favorable conclusions<sup>12</sup>. Recently, researchers have shown that a principal investigators personal financial ties to drug makers are linked to positive study conclusions<sup>13</sup>.

Despite the abundant research on financial conflict of interest regarding provider behavior and the interpretation and results of research, little is known about the relationship between these conflicts in academia and the trajectory of one's academic career. Specifically, among academics, is the presence of financial ties to drug makers

1  
2  
3 associated with research productivity? Moreover, do such associations persist after  
4 also accounting for seniority, and prior scholarship? We sought to answer whether  
5 there is an association between financial ties to the biopharmaceutical industry and  
6 publications, using a cross-sectional study design.  
7  
8  
9  
10  
11  
12  
13  
14  
15

## 16 **Methods:**

### 17 *Building our set of hematologist oncologists*

18 We sought to create a set of clinician researchers based in the United States who are  
19 first or last author on a cancer paper in a top cancer journal in 2015. Authors had to be  
20 based in the United States, since the Affordable Care Act's Sunshine Act provides  
21 disclosures only for these persons. Authors had to be clinicians (not PhDs only), as the  
22 disclosure clause only applies to practicing doctors.  
23  
24  
25  
26  
27  
28  
29  
30  
31  
32  
33

34 We began by searching the three highest impact factor general medical journals (the  
35 *New England Journal of Medicine*, the *Journal of the American Medical Association* and  
36 the *Lancet*) and the three highest impact factor oncology journals that publish original  
37 science (the *Lancet Oncology*, the *Journal of Clinical Oncology* and the *Journal of the*  
38 *National Cancer Institute*) for all original articles on a hematologic or oncologic topic  
39 appearing in 2015. We extracted the title, the first or last author, and whether the  
40 author was based in the United States or abroad. We then removed all authors without  
41 an M.D. degree, who are based outside of the United States (based on primary  
42 affiliation), or who work for the biopharmaceutical industry. Biopharmaceutical  
43  
44  
45  
46  
47  
48  
49  
50  
51  
52  
53  
54  
55  
56  
57  
58  
59  
60

1  
2  
3 employees were removed, as we were interested in the relationship between financial  
4  
5 conflicts and career productivity among academic oncologists.  
6  
7  
8  
9

### 10 *Identifying Financial Conflicts from Biopharmaceutical Companies*

11  
12 We searched the Centers for Medicare and Medicaid Services' Open Payments website  
13  
14 (<https://www.cms.gov/openpayments/>) for payments from biopharmaceutical companies  
15  
16 with at least 1 product on the US market. Companies that do not yet have a product on  
17  
18 the US market are not included in the Affordable Care Act's sunshine provisions.  
19

20  
21 General and research payments were recorded for the years 2013-2015. Other years  
22  
23 are not included in the Sunshine act's disclosures. General payments are those typically  
24  
25 made directly to the physician, often for consulting or honoraria, while research  
26  
27 payments are typical paid to an institution.  
28  
29  
30  
31  
32

### 33 *Documenting publication records*

34  
35 For each author in our dataset, we searched Scopus (<https://www.scopus.com>), using  
36  
37 "Author Search," and recorded their total publications, total citations and h-index. We  
38  
39 then exported their publications to Excel, and sorted by year of publication. We  
40  
41 ascertained the number of papers they published before the year 2013, and the number  
42  
43 of papers published from 2013 to 2016.  
44  
45  
46  
47  
48

### 49 *Years since medical school*

50  
51 For each author, we searched Google to identify a website that listed the number of  
52  
53 years a physician has been in practice since they completed medical school. Where  
54  
55  
56  
57  
58  
59  
60



1  
2  
3 medical school graduation year was found, we subtracted this number from 2016 to  
4  
5 calculate the years from graduation.  
6  
7  
8  
9

### 10 *Statistical analysis*

11  
12 We summarized descriptive statistics of our dataset, after removing outliers by leverage  
13  
14 and Cook's distance for our principal regression analysis. We performed simple linear  
15  
16 regression analysis to ascertain the strength of association between general (or  
17  
18 personal) financial payments from 2013-2015 and publications from 2013 to 2016. We  
19  
20 then expanded this regression to a multivariate model adjusting for years since medical  
21  
22 school, research payments and publications prior to 2013. Our multivariate regression  
23  
24 asked the question: adjusting for career productivity, seniority, and research funding, is  
25  
26 there a persistent association between general payments to physicians and scholarly  
27  
28 output. Our analysis was performed using STATA V.13.0 (College Station, Tx). Since  
29  
30 our study only utilized information that is publicly available, it did not require Institutional  
31  
32 Board Review approval. Our study was conducted between Oct 1 2016 and Dec 31  
33  
34  
35  
36  
37  
38  
39  
40  
41  
42  
43  
44  
45  
46  
47  
48  
49  
50  
51  
52  
53  
54  
55  
56  
57  
58  
59  
60

### 42 **Results:**

44 We identified 435 physician authors who were first or last author on a hematology  
45  
46 oncology paper in a high impact general or oncology journal (*The New England Journal*  
47  
48 *of Medicine*, the *Journal of the American Medical Association*, the *Lancet*, the *Journal of*  
49  
50 *Clinical Oncology*, *The Journal of the National Cancer Institute*, and the *Lancet*  
51  
52 *Oncology*). The characteristics of these doctors are shown in **Table 1**. Notably the  
53  
54  
55  
56  
57  
58  
59  
60

1  
2  
3 median number of years since medical school among these authors was 24. These  
4 authors had authored a median of 140 publications, earning a median h-index of 36 and  
5 5639 citations. The median total of general payments from 2013-2015 was \$3282,  
6 though the range was wide (0-3.4 million dollars). The median amount of research  
7 payments from 2013-2015 was \$3500, ranging from 0 to over 23 million dollars. A  
8 waterfall plot of general and research payments, where each bar corresponds to one  
9 physician, is shown in **Figure 1 and 2**, and demonstrates the distribution of payments to  
10 this group.  
11  
12  
13  
14  
15  
16  
17  
18  
19  
20  
21  
22  
23

24 We performed simple linear regression to examine the correlation between papers  
25 published prior to 2013 and those published between 2013-2016, which is shown in  
26 **Figure 3**. We find a statistically significant correlation (Beta= 0.19,  $p = <0.001$ , 95%  
27 confidence interval 0.17 to 0.20). We then performed our primary analysis of interest  
28 (Figure 2), examining to what degree general payments were associated with  
29 publications (**Figure 4**). Again, we note a significant relationship, with a beta coefficient  
30 of 1.99 meaning an increase in 1.99 papers per every 10,000 dollar increase in general  
31 payments. Full details of the analysis are in **Table 2**.  
32  
33  
34  
35  
36  
37  
38  
39  
40  
41  
42  
43

44 We then performed a multivariate analysis, asking whether the relationship between  
45 personal payments persists after adjustment for prior publications, years since  
46 graduating medical school, and total research payments. The results of this analysis  
47 are in Table 2, and confirm a persistent positive association between personal  
48  
49  
50  
51  
52  
53  
54  
55  
56  
57  
58  
59  
60

1  
2  
3 payments and publications with a smaller magnitude of effect, 0.84 ( $p=0.017$ , 95% CI  
4  
5 0.15 to 1.5) papers per every 10,000 dollars in payment.  
6  
7  
8  
9

## 10 **Discussion**

11  
12 Prior studies have explored the relationship between payments to investigators and the  
13  
14 outcomes of research<sup>14-20</sup>, the relationship between payments or gifts and prescriber  
15  
16 behavior<sup>9,10</sup>, and the even editorial attitudes towards drug products<sup>21,22</sup>. However, to our  
17  
18 knowledge, ours is the first study to examine the association between financial ties to  
19  
20 drug makers and publications, a metric of academic success. In fact, we found that  
21  
22 personal payments to physicians were positively associated with publication, and this  
23  
24 relationship persist even after adjustment for years since graduating medical school (a  
25  
26 measure of seniority) prior publications, and research funding. Our findings suggest  
27  
28 that career productivity is positively affected by personal payments.  
29  
30  
31  
32  
33  
34

35  
36 Some are concerned that current policies against conflict of interest, which largely are  
37  
38 confined to forms of disclosure, may be used to cast aspersions upon conflicted  
39  
40 biomedical researchers<sup>23</sup>. Major journal editors have been critical of policies that restrict  
41  
42 review or editorial articles to authors free of financial conflicts<sup>24</sup>. Our results provide a  
43  
44 reassuring note. The acceptance of industry payments is not associated with fewer  
45  
46 publications; thus prohibitions against financial conflict of interest are not presently so  
47  
48 daunting they hinder researchers' careers. Further prohibitions may be considered.  
49  
50  
51  
52  
53  
54  
55  
56  
57  
58  
59  
60

1  
2  
3 What drives our observation? There are two distinct possibilities underlying the  
4  
5 association we report. First, the biopharmaceutical industry preferentially seeks and  
6  
7 compensates the advice of physicians who are likely to have higher scholarly outputs.  
8  
9 Alternatively, the acceptance of personal payments drive scholarly output—perhaps due  
10  
11 to greater financial security, novel ideas for scholarship, or even ghost author  
12  
13 publications<sup>25-27</sup>. In other words, although our paper highlights an association, we are  
14  
15 unable to show directionality. We are unable to demonstrate which came first, the  
16  
17 increased publications or the increased funding. Because the affordable care act's  
18  
19 sunshine clause is not retroactive, we are unable to perform a longitudinal analysis on  
20  
21 this question. This limitation however provides additional support for the importance of  
22  
23 public disclosure, which permits these types of investigations. In the future, decades of  
24  
25 public disclosure of financial conflict will facilitate important analyses of the implications  
26  
27 of conflict.  
28  
29  
30  
31  
32  
33  
34

35 Finally, our paper shows that the acceptance of personal payments is not used to  
36  
37 marginalize or hinder conflicted researchers—contradicting speculation that current  
38  
39 conflict of interest's policies are excessively restrictive<sup>23</sup>-- as these authors have greater  
40  
41 not fewer publications.  
42  
43  
44  
45

## 46 **Limitations**

47  
48 As with most observational studies, our study can only highlight an association and not  
49  
50 causation. We are unable to conclude whether accepting money from the drug industry  
51  
52 improves a researcher's scholarly output. Yet, experts have postulated that financial  
53  
54  
55  
56  
57  
58  
59  
60

1  
2  
3 ties with the drug industry may increase cross-pollination and ideas, driving scholarly  
4  
5 work<sup>28</sup>.  
6  
7  
8  
9

10 The next limitation is that although we were able to demonstrate that this association  
11  
12 persists after examining prior publications, years since graduating medical school, and  
13  
14 research payments, we did not examine more covariates. We were limited to publicly  
15  
16 available covariates. Yet, we did consider total citation count and h-indices, measures  
17  
18 of research impact; however, these were highly correlated with publication by Pearson  
19  
20 correlation, and would introduce collinearity to models rather than refined prediction.  
21  
22 We encourage others to explore this relationship in different cohorts of researchers.  
23  
24  
25  
26  
27

28 Our findings suggest that an academic deciding to decline personal payments from drug  
29  
30 companies may deprive them both of the benefit of that revenue, and perhaps also the  
31  
32 benefit of increased career publications. This finding should be further explored, and if  
33  
34 validated, may lead to consideration of policies to provide alternative incentives to  
35  
36 physicians who decline industry payments.  
37  
38  
39  
40  
41

## 42 **Conclusion**

43  
44 Among US based physicians who had a first or last authored hematology oncology  
45  
46 paper in a high impact journal, we found the acceptance of personal payments from the  
47  
48 biopharmaceutical industry were associated with increased publications, and this  
49  
50 relationship persisted after adjustment for seniority, prior scholarship and research  
51  
52 funding. Although we only find an increase of about two papers per \$10,000, given that  
53  
54  
55  
56  
57  
58  
59  
60

the median number of papers in our follow-up period is 40, this is a 5% increase in publication output. These findings suggest the careers of conflicted physicians are boosted, not hindered by personal financial ties to the industry.

Table 1:  
Characteristics of physicians with a first or last author paper on a hematologic or oncologic topic in a high impact journal

| Characteristic                    | Median (Low; 25 <sup>th</sup> Percentile; 75 <sup>th</sup> Percentile; High) |
|-----------------------------------|------------------------------------------------------------------------------|
| Frequency as corresponding author | 1 (0;0;1;3)                                                                  |
| Years since med school            | 24 (1;17;33;61)                                                              |
| Number of publications            | 140 (1; 52; 253; 1,906)                                                      |
| Number of citations               | 5,639 (0; 1,452; 13,448; 116,544)                                            |
| H-Index                           | 36 (0; 18; 56; 172)                                                          |
| Number of papers before 2013      | 86 (0; 24; 175; 1486 )                                                       |
| 2013-2016 papers                  | 40 (0; 22; 68; 423)                                                          |
| Total General Payments            | 3,282 (0; 0; 32,578; 3,369,193)                                              |
| Total Research Payments           | 3,500 (0; 0; 691,797; 23,132,162)                                            |

Table 2:  
Simple and multivariate regression examining the association between general payments 2013-2015, research payments 2013-2015, years from medical school and prior publications on future publications between 2013-2016

### Simple Linear Regression

|                                                   | Beta - coefficient | P value | 95% CI       |
|---------------------------------------------------|--------------------|---------|--------------|
| <b>General Payments from 2013-2015 (\$10,000)</b> | 1.99               | <0.001  | 1.07 to 2.90 |

### Multivariate Regression

|                                              | Beta - coefficient | P value | 95% CI         |
|----------------------------------------------|--------------------|---------|----------------|
| <b>General Payments from 2013-2015</b>       | 0.836              | 0.017   | 0.15 to 1.52   |
| <b>Papers published prior to 2013</b>        | 0.236              | <0.001  | .213 to .260   |
| <b>Years since graduating medical school</b> | -1.39              | <0.001  | -1.77 to -1.02 |
| <b>Total Research Payments (10000s)</b>      | 0.0255             | 0.001   | 0.019 to 0.040 |

**Acknowledgements:** VP is funded by the Laura and John Arnold Foundation

Webpage for Jeffrey Flier Paper below:

[https://hms.harvard.edu/sites/default/files/assets/About Us/Deans Rep/files/white paper\\_flier.pdf](https://hms.harvard.edu/sites/default/files/assets/About%20Us/Deans%20Rep/files/white_paper_flier.pdf)

## References:

1. Prasad V, Rajkumar SV. Conflict of interest in academic oncology: moving beyond the blame game and forging a path forward. *Blood Cancer Journal*. 2016;6:e489.
2. Campbell EG. Doctors and drug companies--scrutinizing influential relationships. *N Engl J Med*. 2007;357(18):1796-1797.
3. Campbell EG, Rao SR, DesRoches CM, et al. Physician professionalism and changes in physician-industry relationships from 2004 to 2009. *Arch Intern Med*. 2010;170(20):1820-1826.
4. Boothby A, Wang R, Cetnar J, Prasad V. Effect of the american society of clinical oncology's conflict of interest policy on information overload. *JAMA Oncology*. 2016;2(12):1653-1654.
5. Mitchell AP, Basch EM, Dusetzina SB. Financial relationships with industry among national comprehensive cancer network guideline authors. *JAMA Oncology*. 2016;2(12):1628-1631.
6. Marshall DC, Moy B, Jackson ME, Mackey TK, Hattangadi-Gluth JA. Distribution and Patterns of Industry-Related Payments to Oncologists in 2014. *J Natl Cancer Inst*. 2016;108(12).
7. Tao DL, Boothby A, McLouth J, Prasad V. Financial conflicts of interest among hematologist-oncologists on twitter. *JAMA Internal Medicine*. 2017.
8. DeJong C, Aguilar T, Tseng C, Lin GA, Boscardin W, Dudley R. Pharmaceutical industry-sponsored meals and physician prescribing patterns for medicare beneficiaries. *JAMA Internal Medicine*. 2016;176(8):1114-1110.
9. Yeh JS, Franklin JM, Avorn J, Landon J, Kesselheim AS. Association of industry payments to physicians with the prescribing of brand-name statins in massachusetts. *JAMA Internal Medicine*. 2016;176(6):763-768.
10. Fleischman W, Agrawal S, King M, et al. Association between payments from manufacturers of pharmaceuticals to physicians and regional prescribing: cross sectional ecological study. *BMJ*. 2016;354.
11. Lundh A, Sismondo S, Lexchin J, Busuioc OA, Bero L. Industry sponsorship and research outcome. *Cochrane Database of Systematic Reviews*. 2012(12).
12. Bell CM, Urbach DR, Ray JG, et al. Bias in published cost effectiveness studies: systematic review. *BMJ*. 2006;332(7543):699-703.
13. Ahn R, Woodbridge A, Abraham A, et al. Financial ties of principal investigators and randomized controlled trial outcomes: cross sectional study. *BMJ*. 2017;356.
14. Amiri AR, Kanesalingam K, Cro S, Casey ATH. Does source of funding and conflict of interest influence the outcome and quality of spinal research? *The Spine Journal*. 14(2):308-314.

15. Roy H. Perlis, Clifford S. Perlis, Yelena Wu, Cindy Hwang, Megan Joseph, Andrew A. Nierenberg. Industry Sponsorship and Financial Conflict of Interest in the Reporting of Clinical Trials in Psychiatry. *American Journal of Psychiatry*. 2005;162(10):1957-1960.
16. Perlis CS, Harwood M, Perlis RH. Extent and impact of industry sponsorship conflicts of interest in dermatology research. *Journal of the American Academy of Dermatology*. 52(6):967-971.
17. Pang WK, Yeter KC, Torralba KD, Spencer HJ, Khan NA. Financial conflicts of interest and their association with outcome and quality of fibromyalgia drug therapy randomized controlled trials. *International Journal of Rheumatic Diseases*. 2015;18(6):606-615.
18. Riechelmann RP, Wang L, O'Carroll A, Krzyzanowska MK. Disclosure of Conflicts of Interest by Authors of Clinical Trials and Editorials in Oncology. *Journal of Clinical Oncology*. 2007;25(29):4642-4647.
19. Friedman LS, Richter ED. Relationship between conflicts of interest and research results. *Journal of General Internal Medicine*. 2004;19(1):51-56.
20. Kjaergard L, Als-Nielsen B. Association between competing interests and authors' conclusions: epidemiological study of randomised clinical trials published in the BMJ. *BMJ*. 2002;325(7358):249.
21. Wang AT, McCoy CP, Murad MH, Montori VM. Association between industry affiliation and position on cardiovascular risk with rosiglitazone: cross sectional systematic review. *BMJ*. 2010;340:c1344.
22. Fugh-Berman A, McDonald CP, Bell AM, Bethards EC, Scialli AR. Promotional tone in reviews of menopausal hormone therapy after the Women's Health Initiative: an analysis of published articles. *PLoS Med*. 2011;8(3):e1000425.
23. Rosenbaum L. Reconnecting the Dots — Reinterpreting Industry–Physician Relations. *New England Journal of Medicine*. 2015;372(19):1860-1864.
24. Drazen JM. Revisiting the Commercial–Academic Interface. *New England Journal of Medicine*. 2015;372(19):1853-1854.
25. Gøtzsche PC, Hróbjartsson A, Johansen HK, Haahr MT, Altman DG, Chan A-W. Ghost Authorship in Industry-Initiated Randomised Trials. *PLOS Medicine*. 2007;4(1):e19.
26. Lissoni F, Montobbio F. Guest Authors or Ghost Inventors? Inventorship and Authorship Attribution in Academic Science. *Evaluation Review*. 2015;39(1):19-45.
27. Wislar JS, Flanagan A, Fontanarosa PB, DeAngelis CD. Honorary and ghost authorship in high impact biomedical journals: a cross sectional survey. *BMJ*. 2011;343.
28. Flier JS. White Paper: Conflicts of Interest and Academic Industry Relationships. Harvard Medical School: Harvard University; 2009.



Figure 1:

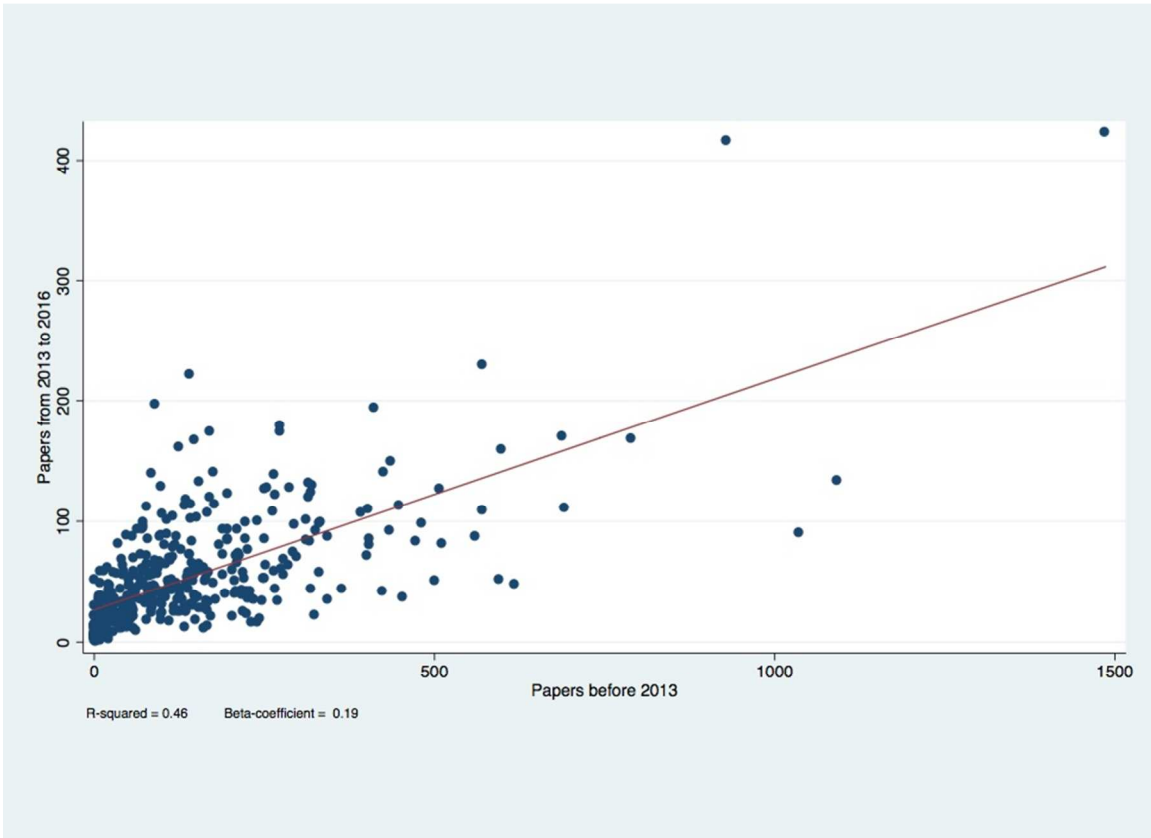

Figure 1: The correlation between publications prior to 2013 and those 2013-16 among physicians publishing in top hematology oncology journals

1  
2  
3  
4  
5  
6  
7  
8  
9  
10  
11  
12  
13  
14  
15  
16  
17  
18  
19  
20  
21  
22  
23  
24  
25  
26  
27  
28  
29  
30  
31  
32  
33  
34  
35  
36  
37  
38  
39  
40  
41  
42  
43  
44  
45  
46  
47  
48  
49  
50  
51  
52  
53  
54  
55  
56  
57  
58  
59  
60

Figure 2

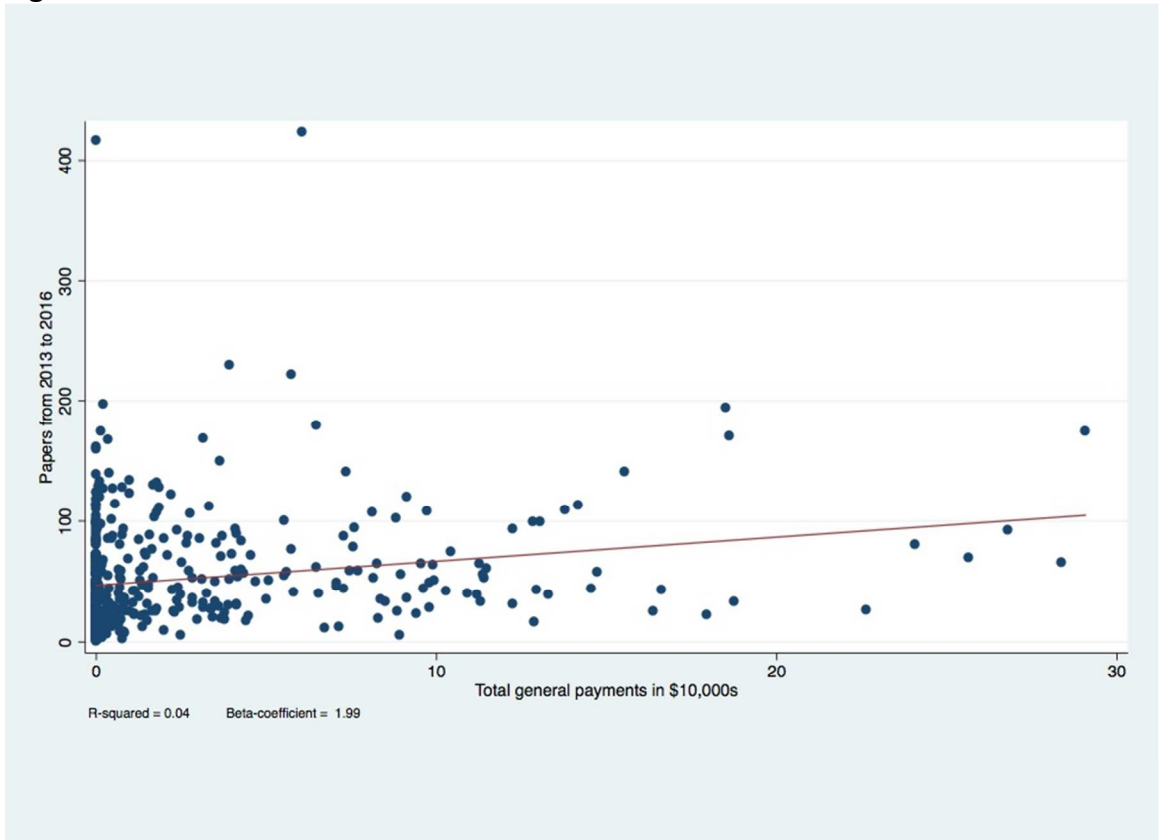

Figure 2: The correlation between personal (general) payments from the biopharmaceutical industry to physicians 2013-15 and number of published papers 2013-16.

Figure 3:

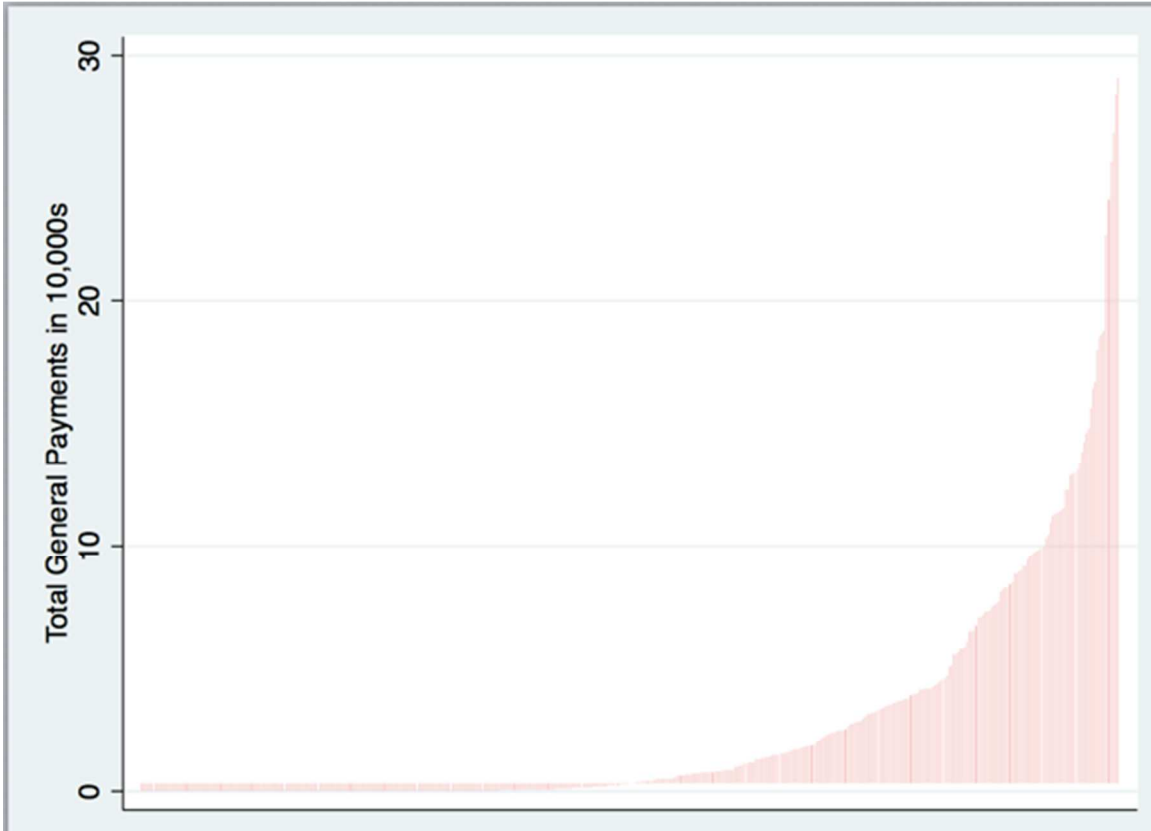

Figure 3: Waterfall plot showing the distribution of general payments. General payments are made personally to a physician. Each individual physician is 1 vertical bar in the figure, and the baseline is set to the median general payment.

1  
2  
3  
4  
5  
6  
7  
8  
9  
10  
11  
12  
13  
14  
15  
16  
17  
18  
19  
20  
21  
22  
23  
24  
25  
26  
27  
28  
29  
30  
31  
32  
33  
34  
35  
36  
37  
38  
39  
40  
41  
42  
43  
44  
45  
46  
47  
48  
49  
50  
51  
52  
53  
54  
55  
56  
57  
58  
59  
60

**Figure 4:**

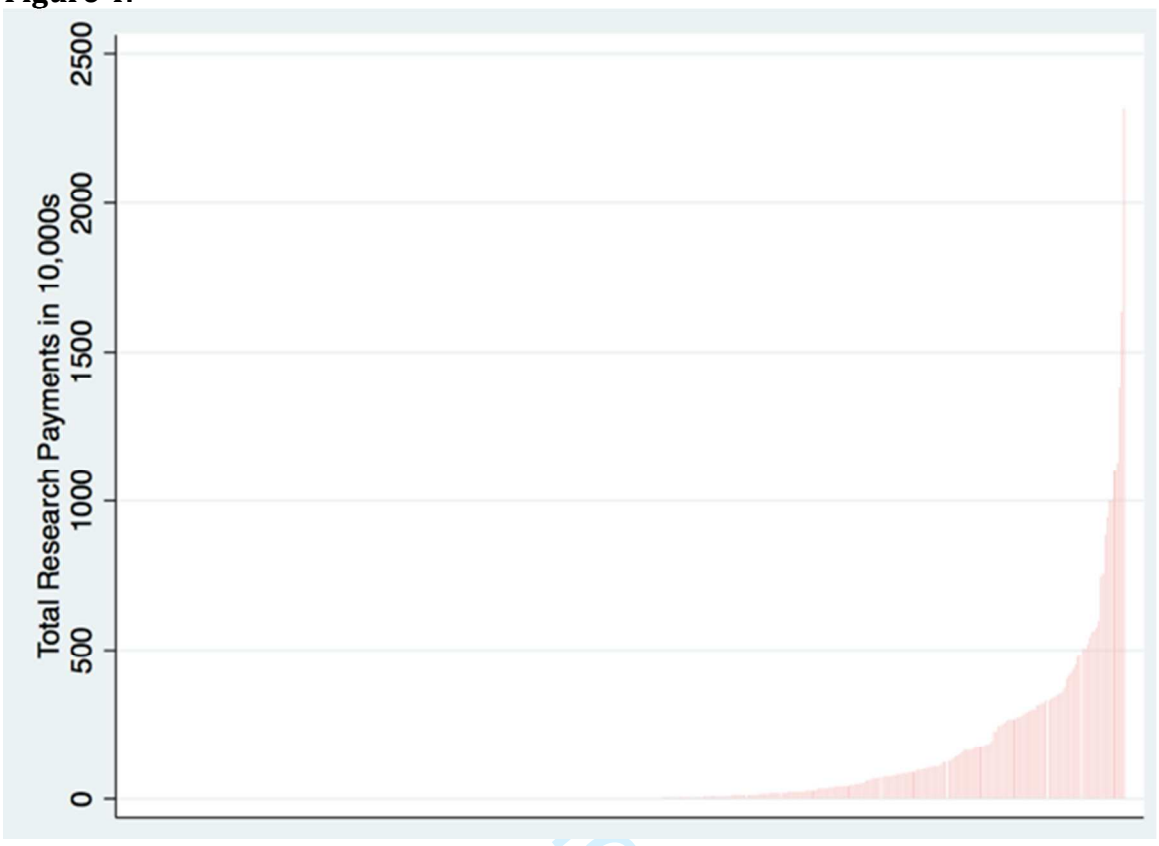

Figure 4: Waterfall plot showing the distribution of research payments. Each individual physician is 1 vertical bar in the figure, and the baseline is set to the median research payment.

## STROBE Statement—checklist of items that should be included in reports of observational studies

|                              | Item No | Recommendation                                                                                                                                                                                                                                                                                                                                                                                                                                                         | Location in study                    |
|------------------------------|---------|------------------------------------------------------------------------------------------------------------------------------------------------------------------------------------------------------------------------------------------------------------------------------------------------------------------------------------------------------------------------------------------------------------------------------------------------------------------------|--------------------------------------|
| Title and abstract           | 1       | (a) Indicate the study's design with a commonly used term in the title or the abstract                                                                                                                                                                                                                                                                                                                                                                                 | Title                                |
|                              |         | (b) Provide in the abstract an informative and balanced summary of what was done and what was found                                                                                                                                                                                                                                                                                                                                                                    | Abstract                             |
| <b>Introduction</b>          |         |                                                                                                                                                                                                                                                                                                                                                                                                                                                                        |                                      |
| Background/rationale         | 2       | Explain the scientific background and rationale for the investigation being reported                                                                                                                                                                                                                                                                                                                                                                                   | Abstract                             |
| Objectives                   | 3       | State specific objectives, including any prespecified hypotheses                                                                                                                                                                                                                                                                                                                                                                                                       | Introduction                         |
| <b>Methods</b>               |         |                                                                                                                                                                                                                                                                                                                                                                                                                                                                        |                                      |
| Study design                 | 4       | Present key elements of study design early in the paper                                                                                                                                                                                                                                                                                                                                                                                                                | Last paragraph<br>Introduction       |
| Setting                      | 5       | Describe the setting, locations, and relevant dates, including periods of recruitment, exposure, follow-up, and data collection                                                                                                                                                                                                                                                                                                                                        | Methods                              |
| Participants                 | 6       | (a) <i>Cohort study</i> —Give the eligibility criteria, and the sources and methods of selection of participants. Describe methods of follow-up<br><i>Case-control study</i> —Give the eligibility criteria, and the sources and methods of case ascertainment and control selection. Give the rationale for the choice of cases and controls<br><i>Cross-sectional study</i> —Give the eligibility criteria, and the sources and methods of selection of participants | Methods                              |
|                              |         | (b) <i>Cohort study</i> —For matched studies, give matching criteria and number of exposed and unexposed<br><i>Case-control study</i> —For matched studies, give matching criteria and the number of controls per case                                                                                                                                                                                                                                                 | N/A                                  |
| Variables                    | 7       | Clearly define all outcomes, exposures, predictors, potential confounders, and effect modifiers. Give diagnostic criteria, if applicable                                                                                                                                                                                                                                                                                                                               | Methods and Results<br>(Limitations) |
| Data sources/<br>measurement | 8*      | For each variable of interest, give sources of data and details of methods of assessment (measurement). Describe comparability of assessment methods if there is more than one group                                                                                                                                                                                                                                                                                   | Methods                              |
| Bias                         | 9       | Describe any efforts to address potential sources of bias                                                                                                                                                                                                                                                                                                                                                                                                              | Methods, controls                    |
| Study size                   | 10      | Explain how the study size was arrived at                                                                                                                                                                                                                                                                                                                                                                                                                              | N/A                                  |
| Quantitative<br>variables    | 11      | Explain how quantitative variables were handled in the analyses. If applicable, describe which groupings were chosen and why                                                                                                                                                                                                                                                                                                                                           | Methods                              |
| Statistical methods          | 12      | (a) Describe all statistical methods, including those used to control for confounding                                                                                                                                                                                                                                                                                                                                                                                  | Methods (Statistical<br>Analysis)    |
|                              |         | (b) Describe any methods used to examine subgroups and                                                                                                                                                                                                                                                                                                                                                                                                                 | N/A                                  |

|                   |     |                                                                                                                                                                                                              |                         |
|-------------------|-----|--------------------------------------------------------------------------------------------------------------------------------------------------------------------------------------------------------------|-------------------------|
|                   |     | interactions                                                                                                                                                                                                 |                         |
|                   |     | (c) Explain how missing data were addressed                                                                                                                                                                  | Methods                 |
|                   |     | (d) <i>Cohort study</i> —If applicable, explain how loss to follow-up was addressed                                                                                                                          | Methods                 |
|                   |     | <i>Case-control study</i> —If applicable, explain how matching of cases and controls was addressed                                                                                                           |                         |
|                   |     | <i>Cross-sectional study</i> —If applicable, describe analytical methods taking account of sampling strategy                                                                                                 |                         |
|                   |     | (e) Describe any sensitivity analyses                                                                                                                                                                        | N/A                     |
| <b>Results</b>    |     |                                                                                                                                                                                                              |                         |
| Participants      | 13* | (a) Report numbers of individuals at each stage of study—eg numbers potentially eligible, examined for eligibility, confirmed eligible, included in the study, completing follow-up, and analysed            | Results                 |
|                   |     | (b) Give reasons for non-participation at each stage                                                                                                                                                         | Methods/Results         |
|                   |     | (c) Consider use of a flow diagram                                                                                                                                                                           |                         |
| Descriptive data  | 14* | (a) Give characteristics of study participants (eg demographic, clinical, social) and information on exposures and potential confounders                                                                     | Methods/Results         |
|                   |     | (b) Indicate number of participants with missing data for each variable of interest                                                                                                                          | N/A                     |
|                   |     | (c) <i>Cohort study</i> —Summarise follow-up time (eg, average and total amount)                                                                                                                             |                         |
| Outcome data      | 15* | <i>Cohort study</i> —Report numbers of outcome events or summary measures over time                                                                                                                          |                         |
|                   |     | <i>Case-control study</i> —Report numbers in each exposure category, or summary measures of exposure                                                                                                         |                         |
|                   |     | <i>Cross-sectional study</i> —Report numbers of outcome events or summary measures                                                                                                                           | N/A                     |
| Main results      | 16  | (a) Give unadjusted estimates and, if applicable, confounder-adjusted estimates and their precision (eg, 95% confidence interval). Make clear which confounders were adjusted for and why they were included | Results                 |
|                   |     | (b) Report category boundaries when continuous variables were categorized                                                                                                                                    | N/A                     |
|                   |     | (c) If relevant, consider translating estimates of relative risk into absolute risk for a meaningful time period                                                                                             | N/A                     |
| Other analyses    | 17  | Report other analyses done—eg analyses of subgroups and interactions, and sensitivity analyses                                                                                                               | N/A                     |
| <b>Discussion</b> |     |                                                                                                                                                                                                              |                         |
| Key results       | 18  | Summarise key results with reference to study objectives                                                                                                                                                     | Discussion              |
| Limitations       | 19  | Discuss limitations of the study, taking into account sources of potential bias or imprecision. Discuss both direction and magnitude of any potential bias                                                   | Discussion: Limitations |
| Interpretation    | 20  | Give a cautious overall interpretation of results considering objectives, limitations, multiplicity of analyses, results from                                                                                | Discussion              |

1  
2  
3  
4  
5  
6  
7  
8  
9  
10

|                          |    |                                                                                                                                                               |            |
|--------------------------|----|---------------------------------------------------------------------------------------------------------------------------------------------------------------|------------|
|                          |    | similar studies, and other relevant evidence                                                                                                                  |            |
| Generalisability         | 21 | Discuss the generalisability (external validity) of the study results                                                                                         | Conclusion |
| <b>Other information</b> |    |                                                                                                                                                               |            |
| Funding                  | 22 | Give the source of funding and the role of the funders for the present study and, if applicable, for the original study on which the present article is based | N/A        |

11  
12  
13  
14

\*Give information separately for cases and controls in case-control studies and, if applicable, for exposed and unexposed groups in cohort and cross-sectional studies.

15  
16  
17  
18  
19  
20  
21  
22  
23  
24  
25  
26  
27  
28  
29  
30  
31  
32  
33  
34  
35  
36  
37  
38  
39  
40  
41  
42  
43  
44  
45  
46  
47  
48  
49  
50  
51  
52  
53  
54  
55  
56  
57  
58  
59  
60

**Note:** An Explanation and Elaboration article discusses each checklist item and gives methodological background and published examples of transparent reporting. The STROBE checklist is best used in conjunction with this article (freely available on the Web sites of PLoS Medicine at <http://www.plosmedicine.org/>, Annals of Internal Medicine at <http://www.annals.org/>, and Epidemiology at <http://www.epidem.com/>). Information on the STROBE Initiative is available at [www.strobe-statement.org](http://www.strobe-statement.org).
